# Supplementary material for: Internists’ ambivalence toward their role in health counseling and promotion: A qualitative study on the internists’ beliefs and attitudes
Source: PLOS journal article supplement (doi:10.1371/journal.pone.0273848), 2022-09-01
Supplement: S2 (10.1371/journal.pone.0273848.s002) [file journal.pone.0273848.s002]

**Manuscript: Internists' ambivalence toward their role in health promotion: a qualitative study of their beliefs and attitudes**

**Supporting file 2. Internists' opinions about their role in promoting a healthy lifestyle (n=28)**

| Statements                                                                                                                     | strongly agree (%) | agree (%)     | don't know/<br>not sure (%) | disagree (%)  | strongly disagree (%) |
|--------------------------------------------------------------------------------------------------------------------------------|--------------------|---------------|-----------------------------|---------------|-----------------------|
| 1. My patients benefit greatly if I, as a doctor, give them advice about their lifestyle                                       | 11                 | 64            | 18                          | 7             |                       |
| 2. My patients benefit greatly if I, as a doctor, motivate them to change their lifestyles                                     | 14                 | 57            | 21                          | 7             |                       |
| 3. Lifestyle advice is important within our team                                                                               | 32                 | 57            | 7                           | 4             |                       |
| 4. My task is to map out their lifestyle for all my patients                                                                   | 18                 | 54            | 18                          | 7             | 4                     |
| 5. My task is to advise my patients on their lifestyle                                                                         | 36                 | 57            | 0                           | 7             |                       |
| 6. My task is to motivate my patients to change their lifestyles                                                               | 21                 | 64            | 11                          | 4             |                       |
| 7. Lifestyle mapping disrupts my relationship with the patient                                                                 |                    |               | 7                           | 57            | 36                    |
| 8. My patients often fail to see that a healthy lifestyle is very important to them                                            |                    | 11            | 32                          | 50            | 7                     |
| 9. My patients are usually unable to change their lifestyles                                                                   | 7                  | 36            | 25                          | 32            |                       |
| 10. Lifestyle change is the patient's responsibility                                                                           | 21                 | 50            | 18                          | 11            |                       |
| 11. It is customary within my team to refer patients for lifestyle interventions                                               | 11                 | 29            | 25                          | 36            |                       |
| 12. It is also my responsibility, as a doctor, that patients live as healthy as possible                                       | 7                  | 54            | 14                          | 25            |                       |
| 13. I have too little time during my consultation to pay attention to a patient's lifestyle                                    | 14                 | 54            | 4                           | 29            |                       |
| 14. When I discuss their (unhealthy) lifestyle, patients often do not appreciate it                                            |                    | 4             | 25                          | 57            | 14                    |
| 15. My knowledge of effective lifestyle interventions is more than sufficient                                                  |                    | 18            | 32                          | 40            | 4                     |
| 16. My conversation skills for lifestyle counseling are more than sufficient                                                   | 4                  | 36            | 29                          | 29            | 4                     |
| 17. When we refer them to a lifestyle intervention, patients with an unhealthy lifestyle will benefit greatly                  | 7                  | 14            | 71                          | 7             |                       |
| 18. Internists have an important role in the care network in prevention and lifestyle change of patients with complex problems | 14                 | 32            | 43                          | 11            |                       |
| 19. The lifestyle interventions I know of are not suitable for my patients                                                     |                    | 7             | 43                          | 43            | 7                     |
| 20. For the last ten patients at your consultation how often did you:                                                          | 0-2 times (%)      | 3-4 times (%) | 5-6 times (%)               | 7-8 times (%) | 9-10 times (%)        |
| ask them questions about their lifestyle                                                                                       | 4                  | 7             | 18                          | 36            | 36                    |
| give them advice about their lifestyle                                                                                         | 4                  | 36            | 18                          | 25            | 18                    |
| motivate them to change their lifestyle                                                                                        | 4                  | 36            | 39                          | 14            | 7                     |
| refer them for changing their lifestyle                                                                                        | 64                 | 25            | 7                           |               | 4                     |

NB Comparing the views between subspecialties did not reveal much differences in the overall pattern except that respondents of Nephrology scored highly positive on S1,2,16 and 18 compared to other subspecialties.

# **Manuscript: Internists' ambivalence toward their role in health promotion: a qualitative study of their beliefs and attitudes**

## **Description of the results of the statement-list**

### **The importance, benefits and success of HC&P and the role of internists**

Most respondents agreed with the statements: my patients benefit greatly if I, as a doctor, advise (75%) and motivate (71%) patients to change their lifestyle (S1,2). Almost all respondents (89%) agreed lifestyle advice is considered important within their team or subspecialty (S3)

### **Tasks and responsibilities (T&R) in HC&P**

The majority of the respondents agreed with the statements that it is the task of the internist always to map out the lifestyle of patients (71%), advice patients (93%) and motivate them (85%) (S4,5,6). A minority (38%) agreed it is a habit in the team to refer patients for a lifestyle intervention (S11). Most respondents (71%) agreed that patients are responsible for changing their lifestyle, and 61% agreed internists too are responsible (S10,12).

### **Patient-doctor relationship, patients' ability, and internists' motivational skills**

A large majority (93%) disagreed that lifestyle mapping disrupts the patient-doctor relationship (S7), and a small part (4%) agreed that patients do not appreciate a conversation about lifestyle (S14). A minority (11%) agreed that patients do not understand that a healthy lifestyle is important (S8), and 43% agreed that patients are not capable changing their lifestyle (S9). A minority (39%) agreed that they (as internists) have more than sufficient communication skills (S16)

### **Time, knowledge about interventions and collaboration in the care network**

A majority (68%) agreed having to little time to pay attention to lifestyle during the consultation (S13). Few (18%) agreed that their knowledge of effective lifestyle interventions is more than sufficient (S15). A minority (21%) agreed (71% did not know) whether patients with an unhealthy lifestyle would benefit from a referral to a lifestyle intervention (S17). Few (7%) agreed (43% did not know) that the lifestyle interventions they know of are not suitable for their patients (S19). A minority (43%) agreed (46% was not sure) that the internist has an important (coordinating) role in the care network (S18).

### **The internists actual performance**

The last question was: 'given the last ten patients at your out-patient clinic, how often did you: a. ask questions about lifestyle; b. give advice; c. motivate; d. refer your patient for changing their lifestyle'.

The result was that in the majority (> 6) of the last 10 cases, respondents most often asked questions about lifestyle (72%), and least motivated (21%) and referred patients (4%). Some explained the low referral scores as follows: patients come for follow-up visits; lifestyle has been previously discussed; patients have been referred already.

### **Conclusion**

The results point to a gap between the importance the internists attach to promoting a healthy lifestyle and their actual performance.
